# Supplementary material for: Flower-like perovskite LaCr0.9Ni0.1O3−δ–NiO nanostructures: a new candidate for CO2 reforming of methane
Source: Royal Society of Chemistry journal article supplement (doi:10.1039/c4ra00398e), 2014-01-01
Supplement: c4ra00398e1.pdf [file c4ra00398e1.pdf]

## Supplementary Information

### Flower-like perovskite $\text{LaCr}_{0.9}\text{Ni}_{0.1}\text{O}_{3-\delta}$ -NiO nanostructures: A new candidate for $\text{CO}_2$ reforming of methane

Taiwo Odedairo, Wei Zhou, Jiuling Chen and Zhonghua Zhu\*

School of Chemical Engineering, The University of Queensland, St Lucia, Brisbane, Queensland 4072, Australia.

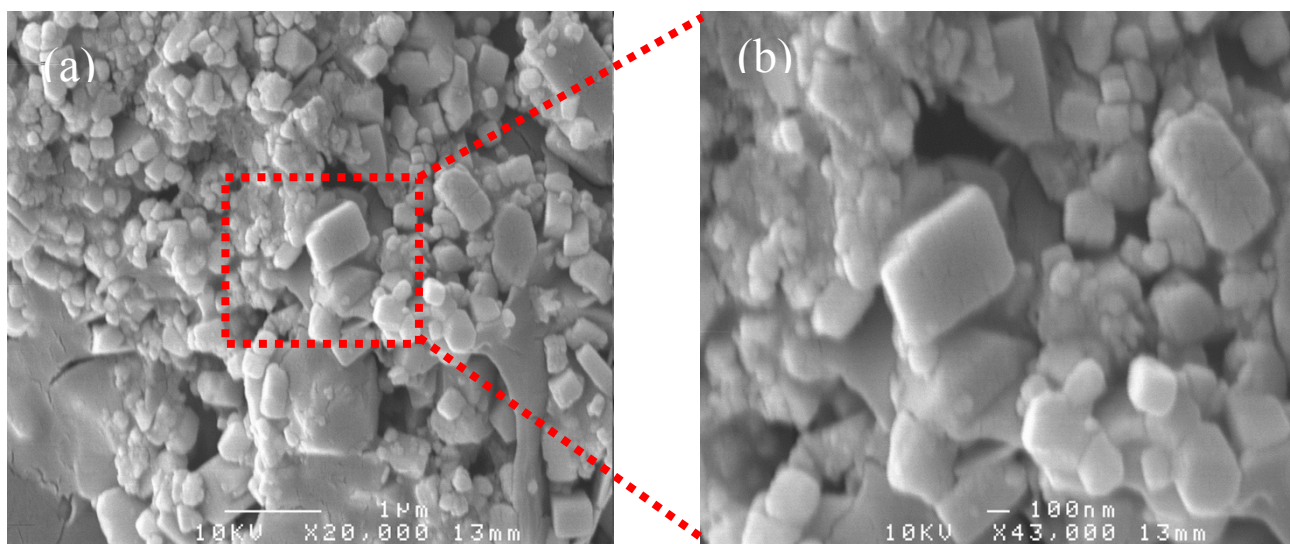

**Figure S1** Low- and high-magnification FESEM micrographs of  $\text{LaCr}_{0.9}\text{Ni}_{0.1}\text{O}_{3-\delta}$  in the absence of urea (C-LCN)

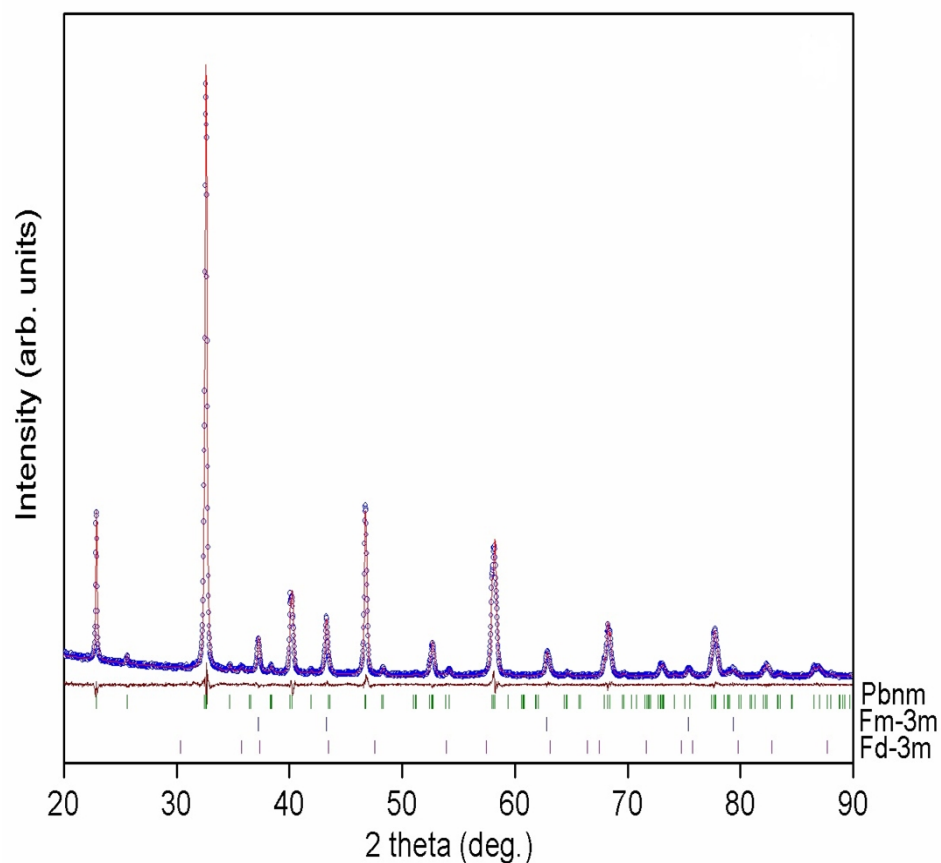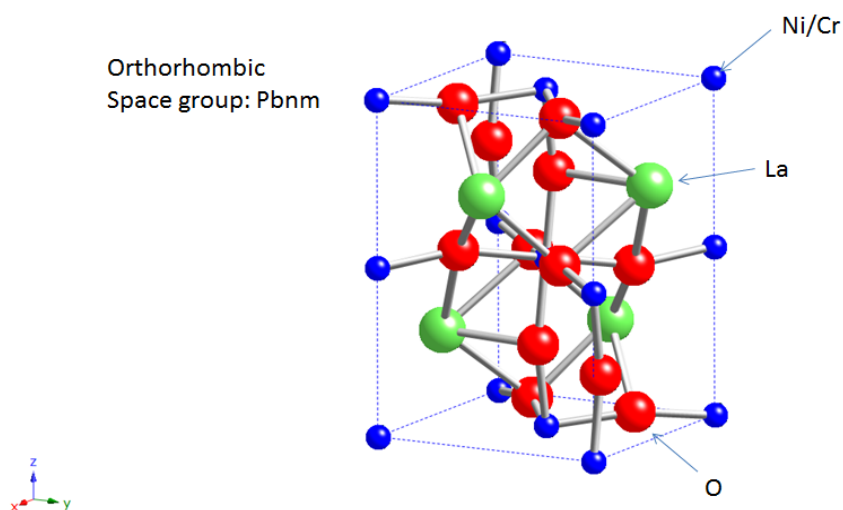

**Figure S2** Structural analysis of  $\text{LaCr}_{0.9}\text{Ni}_{0.1}\text{O}_{3-\delta}$  (LCN) nanowires (a) and schematic representation of the orthorhombic  $\text{LaCr}_{1-x}\text{Ni}_x\text{O}_{3-\delta}$  (b) (Le Bail refined XRD pattern of  $\text{LaCr}_{0.9}\text{Ni}_{0.1}\text{O}_{3-\delta}$  with experimental data (red dots), calculated profiles (blue line), difference curve (green line), and the calculated Bragg positions (vertical bar) for each phase.

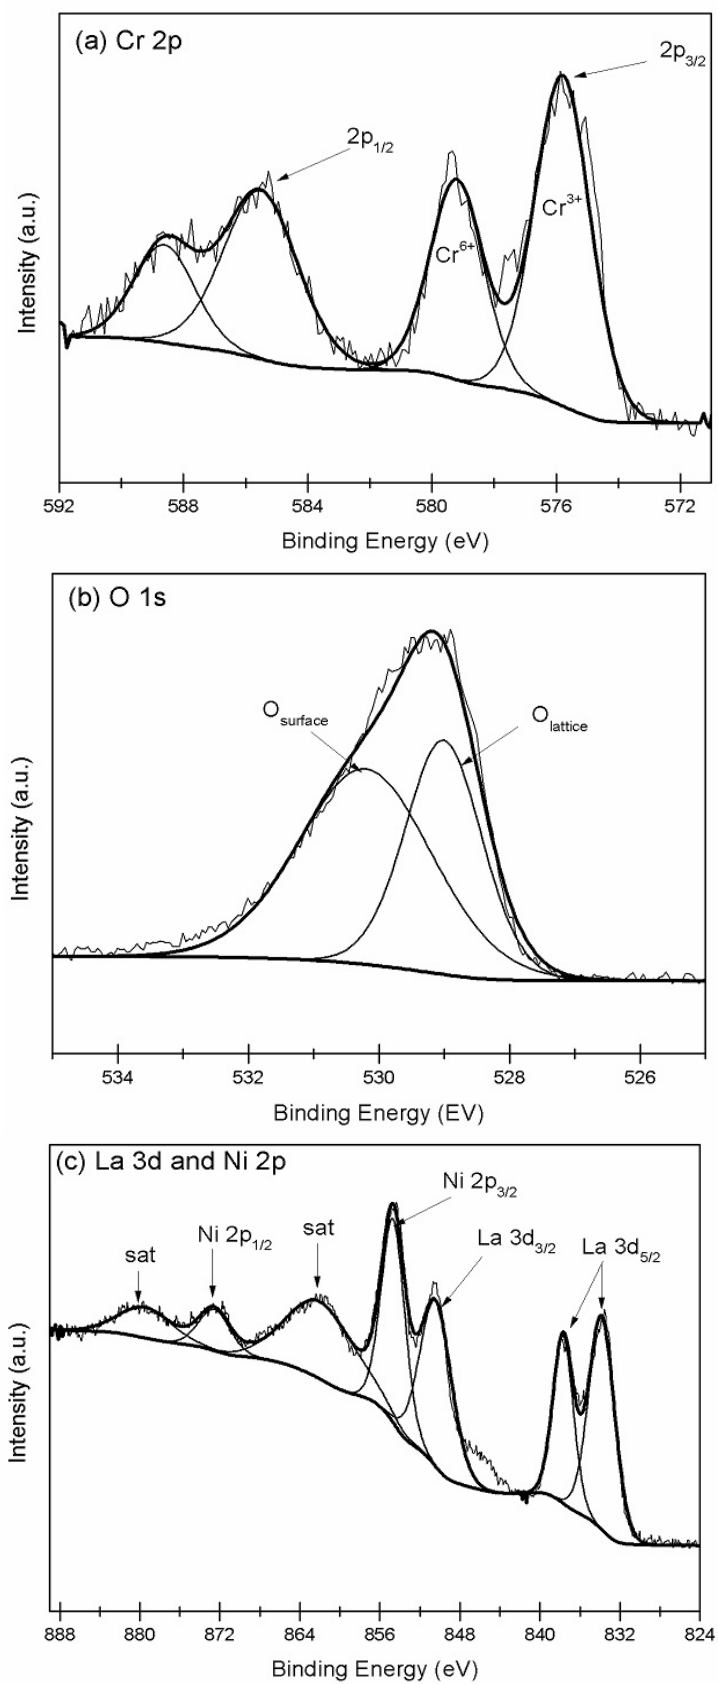

**Figure S3** XPS spectra: (a) Cr 2p, (b) O 1s, and (c) La 3d and Ni 2p regions of  $LaCr_{0.9}Ni_{0.1}O_{3-\delta}$  (LCN) nanowires.

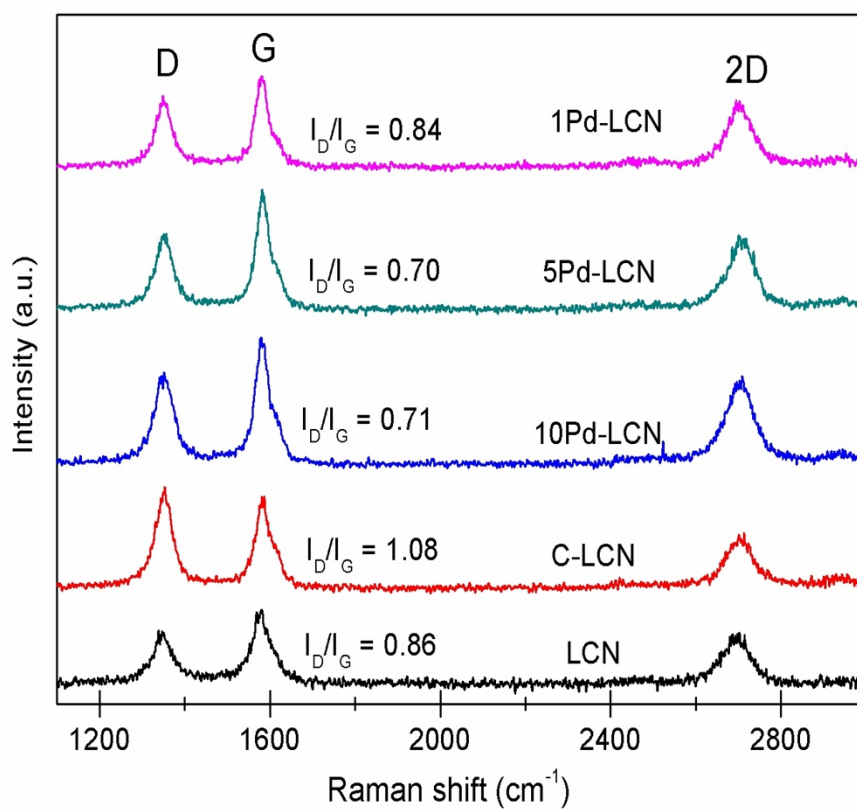

**Figure S4** Raman spectra of carbonaceous materials on LCN, C-LCN, 1Pd-LCN, 5Pd-LCN and 10Pd-LCN.

**Table S1.** Refined structural parameters of  $\text{LaCr}_{1-x}\text{Ni}_x\text{O}_3$  (LCN) nanowires

| Parameter         | 1st phase (Major)                            | 2nd phase  | 3rd phase                 |
|-------------------|----------------------------------------------|------------|---------------------------|
|                   | $\text{LaCr}_{0.9}\text{Ni}_{0.1}\text{O}_3$ | NiO        | $\text{NiCr}_2\text{O}_4$ |
| Fraction (%)      | 76.52                                        | 20.15      | 3.33                      |
| a (Å)             | 5.5185 (4)                                   | 4.1815 (2) | 8.3354 (4)                |
| b (Å)             | 5.4817 (3)                                   | -          | -                         |
| c (Å)             | 7.7665 (1)                                   | -          | -                         |
| crystal structure | orthorhombic                                 | cubic      | cubic                     |
| Space group       | Pbnm                                         | Fm-3m      | Fd-3m                     |

$\chi^2 = 1.32$ ,  $R_p = 3.51$  and  $R_{wp} = 4.47$ .

**Table S2.** XPS surface compositions of 1Pd-LCN, 5Pd-LCN and 10Pd-LCN.

| Sample   | Surface composition (at. %) |       |      |      |      |      |      |
|----------|-----------------------------|-------|------|------|------|------|------|
|          | C1s                         | O1s   | N1s  | La3d | Cr2p | Pd3d | Ni2p |
| 1Pd-LCN  | 28.50                       | 55.07 | 3.97 | 3.44 | 3.05 | 0.15 | 5.83 |
| 5Pd-LCN  | 22.48                       | 58.88 | 3.12 | 4.47 | 3.37 | 1.38 | 6.30 |
| 10Pd-LCN | 25.12                       | 59.39 | -    | 4.42 | 2.83 | 2.20 | 6.03 |
